# Supplementary material
Source: publisher site journal article supplement (http://www.e-cmh.org/upload/media/cmh-2023-0131-Supplementary-Fig-3.pdf)
Supplement: Supplementary file 1 [file cmh-2023-0131-Supplementary-Fig-3.pdf]

|                                 |                                   |                                   |                                   |                                   |                                   |                     |                     |     |
|---------------------------------|-----------------------------------|-----------------------------------|-----------------------------------|-----------------------------------|-----------------------------------|---------------------|---------------------|-----|
| Local progression-free survival | CA                                |                                   |                                   |                                   |                                   |                     |                     |     |
|                                 | 0.90<br>(0.22-3.73)               | TACE+RFA                          |                                   |                                   |                                   |                     |                     |     |
|                                 | 0.78<br>(0.22-2.71)               | 0.86<br>(0.28-2.65)               | PBT                               |                                   |                                   |                     |                     |     |
|                                 | 0.66<br>(0.18-2.38)               | 0.73<br>(0.23-2.33)               | 0.84<br>(0.33-2.17)               | LA                                |                                   |                     |                     |     |
|                                 | 0.57<br>(0.19-1.67)               | 0.63<br>(0.25-1.59)               | 0.73<br>(0.39-1.37)               | 0.86<br>(0.43-1.74)               | RFA                               |                     |                     |     |
|                                 | 0.41<br>(0.12-1.34)               | 0.45<br>(0.16-1.30)               | 0.53<br>(0.24-1.17)               | 0.62<br>(0.26-1.47)               | 0.72<br>(0.44-1.18)               | MWA                 |                     |     |
|                                 | <b>0.22</b><br><b>(0.06-0.77)</b> | <b>0.25</b><br><b>(0.08-0.75)</b> | <b>0.29</b><br><b>(0.12-0.69)</b> | <b>0.34</b><br><b>(0.14-0.85)</b> | <b>0.39</b><br><b>(0.22-0.71)</b> | 0.55<br>(0.25-1.19) | PAI                 |     |
|                                 | <b>0.21</b><br><b>(0.06-0.68)</b> | <b>0.23</b><br><b>(0.08-0.66)</b> | <b>0.27</b><br><b>(0.12-0.60)</b> | <b>0.32</b><br><b>(0.14-0.75)</b> | <b>0.37</b><br><b>(0.23-0.60)</b> | 0.51<br>(0.26-1.03) | 0.94<br>(0.55-1.60) | PEI |

**Supplementary Figure 3.** League table showing hazard ratios of local progression-free survival for pairwise comparisons between treatments. Comparisons should be read from left to right. HRs (95% confidence intervals [CI]) for comparisons are in the shared cells. PAI, percutaneous acetic acid injections; CA, cryoablation; RFA, radiofrequency ablation; LA, laser ablation; PBT, proton beam therapy; TACE, trans-arterial chemoembolization; MWA, microwave ablation; PEI, percutaneous ethanol injection; HRs, hazard ratios.
